# Supplementary material
Source: PubMed Central journal article supplement (PMC4184926)
Supplement: NIHMS621406-supplement-1.pdf [file NIHMS621406-supplement-1.pdf]

## Supplement Figures, 1-5, and Figure Legend

**Supplement Figure 1.** Morphology and immunophenotype of pSTAT3+ DLBCL. **A-D.** Diffuse large B-cell lymphoma (DLBCL), ABC subtype. **A.** Hematoxylin and Eosin. Diffuse sheet of large lymphoma cells with irregular nuclear contours, dispersed chromatin, 2-3 nucleoli and moderate amount of cytoplasm, consistent with centroblastic morphology. **B.** Lymphoma cells are positive for MUM1. **C.** Nuclear expression of phosphorylated STAT3 (pSTAT3) in lymphoma cells. **D.** pSTAT3+ DLBCL lymphoma cells are positive for MYC expression. **E-H.** DLBCL, GCB subtype. **E.** Hematoxylin and Eosin. Similar morphology is observed in pSTAT3+ DLBCL. **F.** Lymphoma cells are positive for CD10. **G.** Nuclear expression of pSTAT3 is not present in lymphoma cells. **H.** pSTAT3- DLBCL lymphoma cells are negative for MYC expression. All images were photographed at 400X magnification.

**Supplement Figure 2.** Relationship between *STAT3* mRNA and pSTAT3 expression and survival analysis based on *STAT3* mRNA level. **A.** Correlation between *STAT3* mRNA level and pSTAT3 expression in lymphoma cells is observed. Red bar denotes the mean value of pSTAT3 expression in lymphoma cells. low; low *STAT3* mRNA, int; intermediate *STAT3* mRNA, high; *STAT3* mRNA. Please see manuscript text for the reason of separation. **B.** Overall survival in all cases based on *STAT3* mRNA level. **C.** Overall survival in GCB DLBCL based on *STAT3* mRNA level. **D.** Overall survival in ABC DLBCL based on *STAT3* mRNA level.

**Supplement Figure 3.** Survival analyses based on pSTAT3 expression in DLBCL with MYC/BCL2 double expression and DLBCL without MYC/BCL2 double expression after COO stratification. In all groups, statistical significances were not observed in terms of overall survival (OS).

**Supplement Figure 4.** Overall survival (OS) and progression-free survival (PFS) in all DLBCL cases, DLBCL with germinal center B-cell-like phenotype (GCB) and DLBCL with activated B-cell-like phenotype (ABC). With 30% cutoff, no differences were seen OS and PFS between pSTAT3+ DLBCL and pSTAT3- DLBCL as well as in GCB/ABC subgroups.

**Supplement Figure 5.** Survival analyses in 3 and 4 groups based on pSTAT3 expression in lymphoma cells. In the upper row with three groups, risk stratification is statistically significant in OS ( $p=0.0009$ ) and PFS ( $p=0.010$ ). In the lower row, overall risk stratification is observed in OS ( $p=0.024$ ) and PFS ( $p=0.021$ ). However, statistical significance was not observed between Q3 and Q4 in OS ( $p=0.798$ ) and PFS ( $p=0.489$ ). In the upper row, when Q3 and Q4 combined, risk stratification is becomes more powerful.

OS; overall survival, PFS; progression-free survival, **Upper row**, T1; pSTAT3 expression  $\leq 20\%$  of lymphoma cells, T2; pSTAT3 expression  $\geq 30\%$  and  $< 50\%$  of lymphoma cells, T3; pSTAT3 expression  $\geq 50\%$  lymphoma cells. **Lower row**, Q1; pSTAT3 expression  $< 30\%$  of lymphoma cells, Q2; pSTAT3 expression  $\geq 30\%$  and  $< 50\%$  of lymphoma cells, Q3; pSTAT3 expression  $\geq 50\%$  and  $< 70\%$  of lymphoma cells, Q4; pSTAT3 expression  $\geq 70\%$  of lymphoma cells,

Supplement Figure 1.

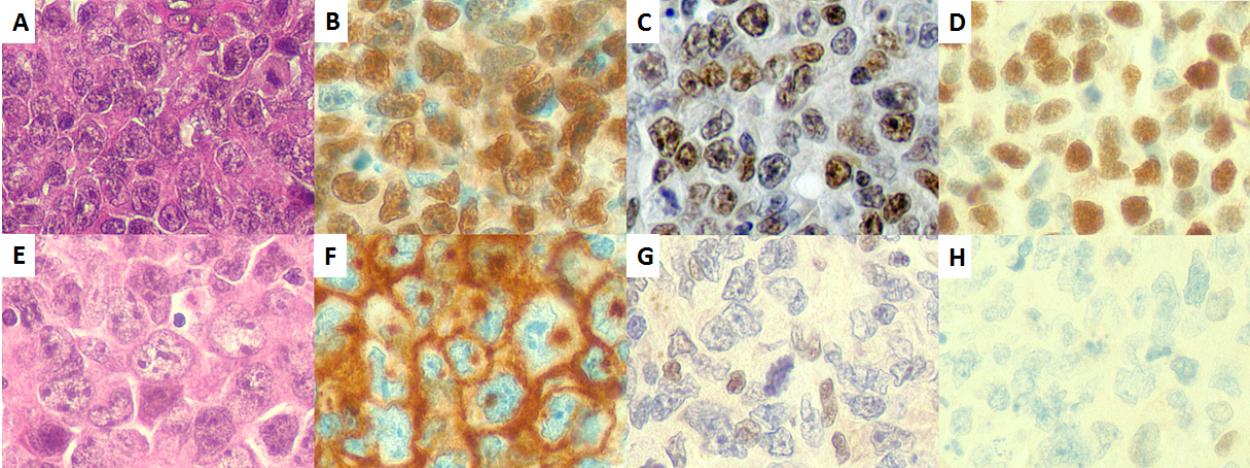

Supplement Figure 2.

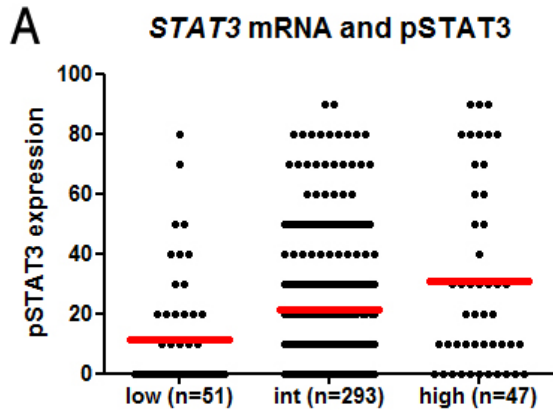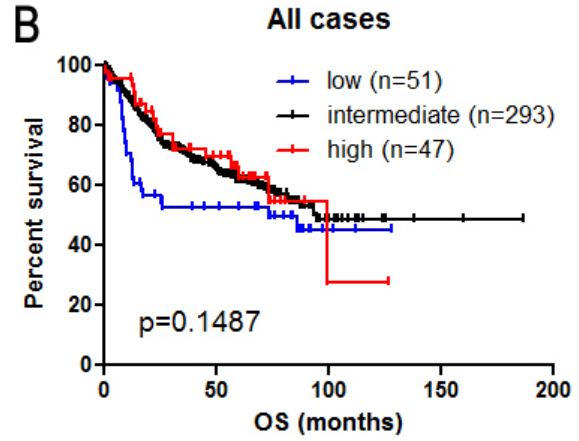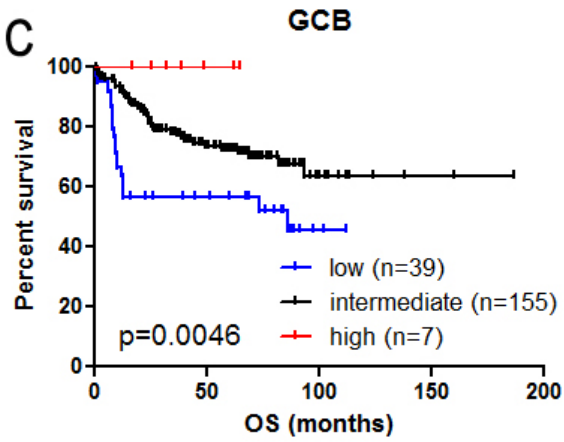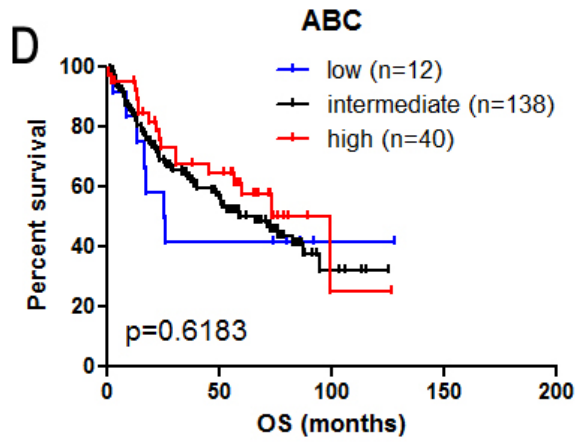

Supplement Figure 3.

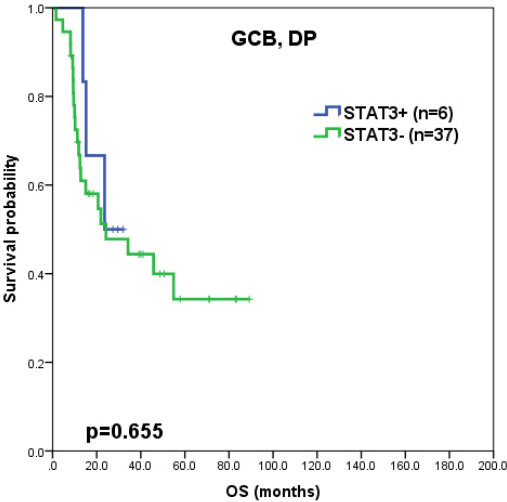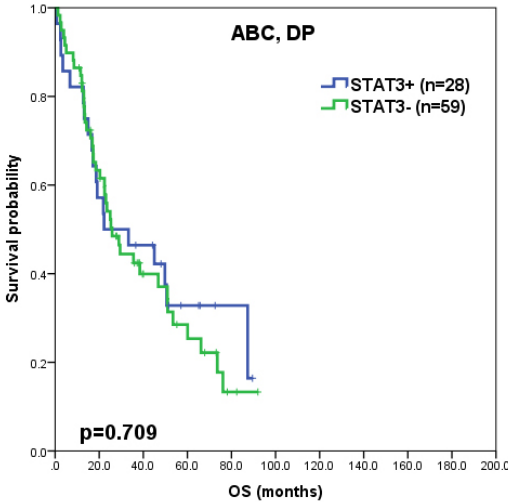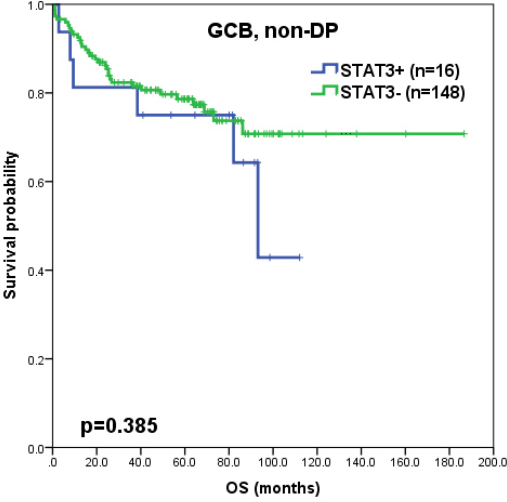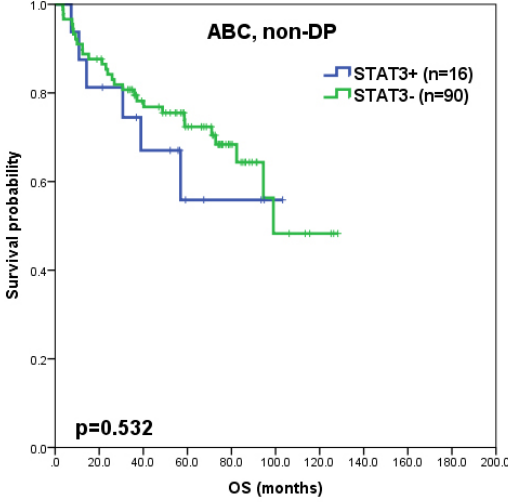

Supplement Figure 4.

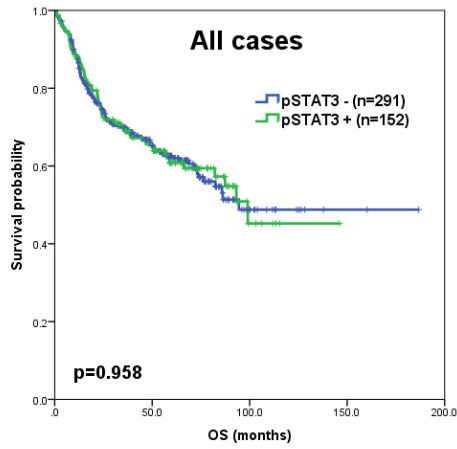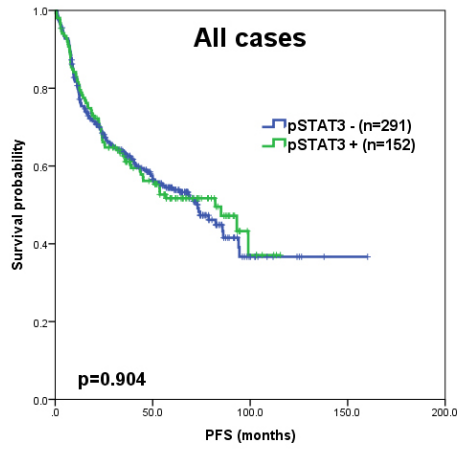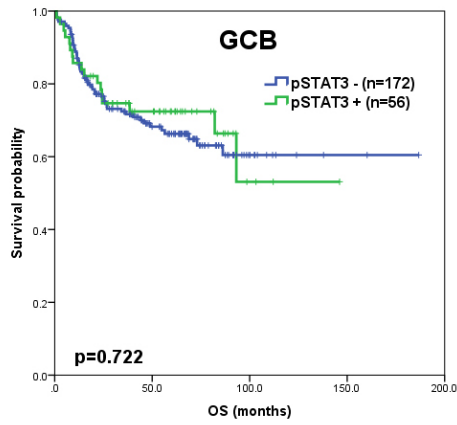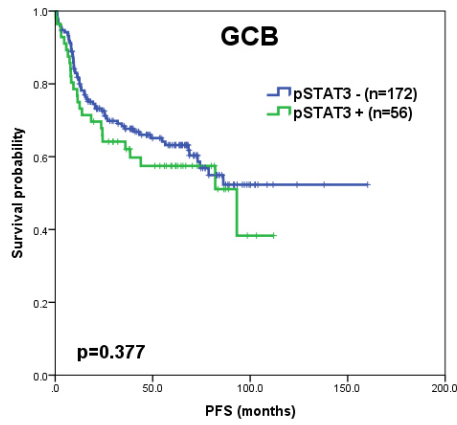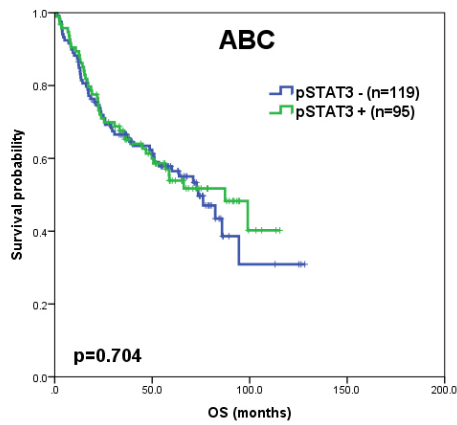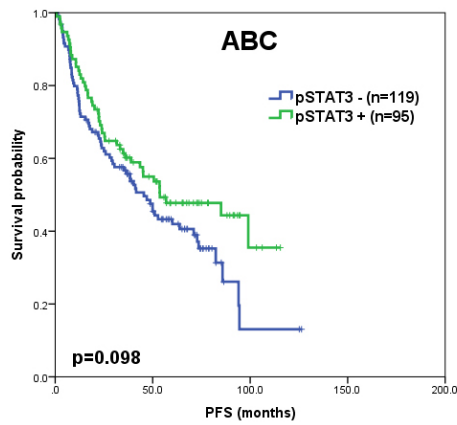

Supplement Figure 5.

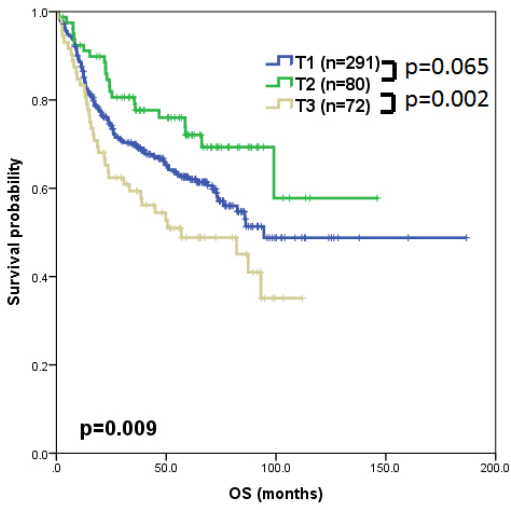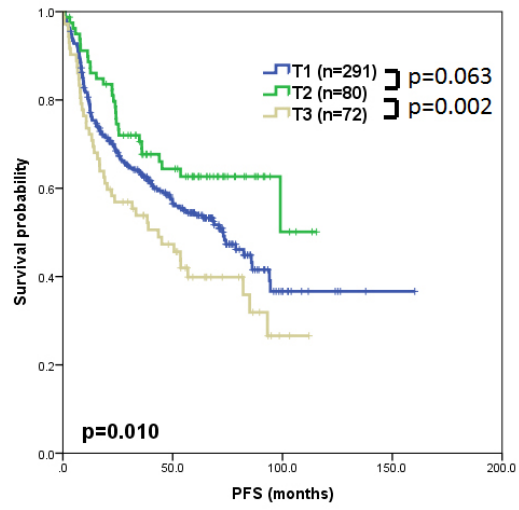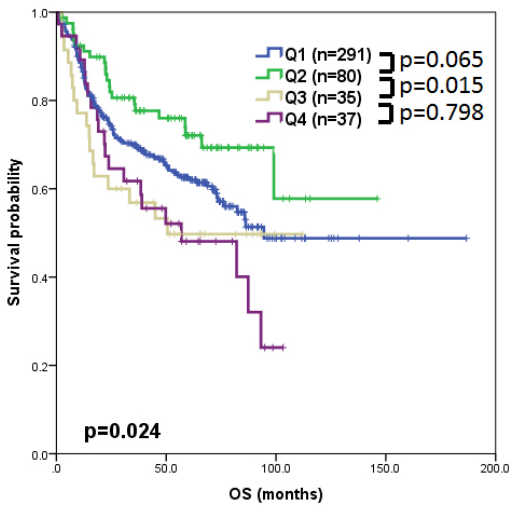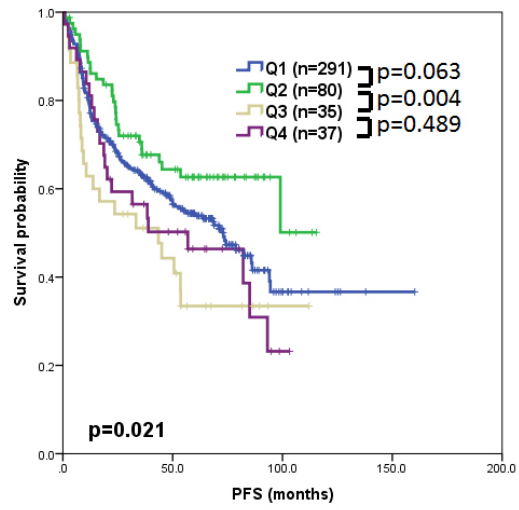

## Supplement Tables

**Supplement Table 1.** Number of cases based on pSTAT3 expression, MYC/BCL2 double expression and COO classification

|         | MYC/BCL2 double positive (DP) |     |                  | MYC/BCL2 non-double positive (non-DP) |     |                  |
|---------|-------------------------------|-----|------------------|---------------------------------------|-----|------------------|
|         | GCB                           | ABC | not-classifiable | GCB                                   | ABC | not-classifiable |
| pSTAT3+ | 6                             | 28  | 0                | 16                                    | 16  | 0                |
| pSTAT3- | 37                            | 59  | 0                | 148                                   | 90  | 0                |

\*COO; cell-of-origin, GCB; germinal center B-cell-like phenotype, ABC; activated B-cell-like phenotype

**Supplement Table 2.** The numbers and percentages of pSTAT3 positive DLBCL with each cutoff

| pSTAT3 cutoff | 10% | 20% | 30% | 40% | <b>50%</b> | 60% | 70% | 80% | 90% |
|---------------|-----|-----|-----|-----|------------|-----|-----|-----|-----|
| n             | 298 | 227 | 152 | 103 | <b>72</b>  | 48  | 37  | 24  | 5   |
| %             | 67% | 51% | 34% | 23% | <b>16%</b> | 11% | 8%  | 5%  | 1%  |

**Supplement Table 3.** Clinical characteristics and cell-of-origin differentiation with 30% cutoff for pSTAT3 expression

|                   | pSTAT3+ (cutoff 30%) | pSTAT3- (cutoff 30%) | p value |
|-------------------|----------------------|----------------------|---------|
|                   | N(%)                 | N(%)                 |         |
| <b>patients</b>   | 152 (34.3)           | 291 (65.7)           |         |
| <b>Gender</b>     |                      |                      |         |
| male              | 95 (63)              | 165 (57)             |         |
| female            | 57 (37)              | 126 (43)             | 0.264   |
| <b>Age</b>        |                      |                      |         |
| <60               | 59 (39)              | 126 (43)             |         |
| ≥60               | 93 (61)              | 165 (56)             | 0.417   |
| <b>B symptoms</b> |                      |                      |         |
| Absent            | 85 (60)              | 177 (70)             |         |

|                           |          |          |        |
|---------------------------|----------|----------|--------|
| Present                   | 56 (40)  | 77 (30)  | 0.060  |
| <b>ECOG</b>               |          |          |        |
| <2                        | 113 (85) | 207 (84) |        |
| ≥2                        | 20 (15)  | 39 (16)  | 0.883  |
| <b>Stage</b>              |          |          |        |
| I/II                      | 59 (40)  | 137 (49) |        |
| III/IV                    | 90 (60)  | 141 (51) | 0.067  |
| <b>Extranodal site</b>    |          |          |        |
| <2                        | 112 (76) | 218 (79) |        |
| ≥2                        | 35 (24)  | 58 (21)  | 0.538  |
| <b>LDH</b>                |          |          |        |
| Normal                    | 56 (40)  | 85 (33)  |        |
| Elevated                  | 84 (60)  | 174 (67) | 0.156  |
| <b>IPI</b>                |          |          |        |
| 0-2                       | 78 (52)  | 164 (57) |        |
| 3-5                       | 72 (48)  | 122 (43) | 0.311  |
| <b>Tumor size, cm</b>     |          |          |        |
| <6                        | 77 (66)  | 151 (68) |        |
| ≥6                        | 40 (34)  | 72 (32)  | 0.718  |
| <b>Treatment response</b> |          |          |        |
| CR/PR                     | 138 (91) | 257 (88) |        |
| No response               | 14 (9)   | 34 (12)  | 0.52   |
| <b>COO classification</b> |          |          |        |
| GCB                       | 56 (37)  | 172 (59) |        |
| ABC                       | 95 (63)  | 119 (41) | <0.001 |

\*pSTAT3, phosphorylated STAT3; ECOG, Eastern Cooperative Oncology Group; LDH, lactic dehydrogenase; IPI, International Prognostic Index; CR, complete remission; PR, partial remission; COO, cell-of-origin; GCB, germinal center B-cell-like; ABC, activated B-cell-like



**Supplement Table 4.** Distribution of cell-of-origin classification based on 4 groups of pSTAT3 expression in lymphoma cells.

|            | <b>Q1, N(%)</b> | <b>Q2, N(%)</b> | <b>Q3, N(%)</b> | <b>Q4, N(%)</b> | <b>P value</b> |
|------------|-----------------|-----------------|-----------------|-----------------|----------------|
| <b>GCB</b> | 172 (59)        | 32 (40)         | 15 (43)         | 9 (24)          |                |
| <b>ABC</b> | 119 (41)        | 47 (60)         | 20 (57)         | 28 (76)         | <0.001         |

\*Q1: pSTAT3 expression  $\leq$ 20% of lymphoma cells, Q2: pSTAT3 expression  $\geq$ 30% and <50% of lymphoma cells, Q3: pSTAT3 expression  $\geq$ 50% and <70% of lymphoma cells, Q4: pSTAT3 expression  $\geq$ 70% of lymphoma cells, GCB, germinal center B-cell-like; ABC, activated B-cell-like

**Supplement Table 5.** Distribution of cell-of-origin classification based on 3 groups of pSTAT3 expression in lymphoma cells.

|            | <b>T1, N(%)</b> | <b>T2, N(%)</b> | <b>T3, N(%)</b> | <b>P value</b> |
|------------|-----------------|-----------------|-----------------|----------------|
| <b>GCB</b> | 172 (59)        | 32 (40)         | 24 (33)         |                |
| <b>ABC</b> | 119 (41)        | 47 (60)         | 48 (67)         | <0.001         |

\*T1: pSTAT3 expression  $\leq$ 20% of lymphoma cells, T2: pSTAT3 expression  $\geq$ 30% and <50% of lymphoma cells, T3: pSTAT3 expression  $\geq$ 50% lymphoma cells, GCB, germinal center B-cell-like; ABC, activated B-cell-like

**Supplement Table 6.** Bivariate analyses of pSTAT3 with each variable and pSTAT3.

|                                                       | <b>HR</b> | <b>95% CI</b>  | <b>p value</b> |
|-------------------------------------------------------|-----------|----------------|----------------|
| <b>pSTAT3</b>                                         | 1.066     | 0.717 to 1.585 | 0.753          |
| <b>MYC</b>                                            | 2.573     | 1.721 to 3.848 | <0.001         |
| <b>pSTAT3</b>                                         | 1.462     | 1.015 to 2.106 | 0.041          |
| <b>ABC subtype</b>                                    | 1.424     | 1.047 to 1.937 | 0.024          |
| <b>pSTAT3</b>                                         | 1.347     | 0.927 to 1.958 | 0.118          |
| <b><math>\geq</math>2 Extranodal site involvement</b> | 2.342     | 1.680 to 3.267 | <0.001         |
| <b>pSTAT3</b>                                         | 1.346     | 0.931 to 1.946 | 0.115          |
| <b>stage III/IV</b>                                   | 2.506     | 1.789 to 3.510 | <0.001         |

\*ABC, activated B-cell-like
